# Supplementary material for: How short peptides can disassemble ultra-stable tau fibrils extracted from Alzheimer’s disease brain by a strain-relief mechanism
Source: Research Square preprint supplement (doi:10.21203/rs.3.rs-4152095/v1), 2024-05-08
Supplement: Supplementary file 1 [file 8a5ca1cadcc10dbca60ba0b5.pdf]

## **Supplementary Information**

**How short peptides can disassemble ultra-stable tau fibrils extracted from Alzheimer's disease brain by a strain-relief mechanism**

Ke Hou<sup>\*</sup>, Peng Ge, Michael R. Sawaya, Joshua L. Dolinsky, Yuan Yang, Yi Xiao Jiang, Liisa Lutter, David R. Boyer, Xinyi Cheng, Justin Pi, Jeffrey Zhang, Jiahui Lu, Shixin Yang, Zhiheng Yu, Juli Feigon, David S. Eisenberg<sup>\*</sup>

**Supplementary Table 1. Cryo-EM statistics of D-TLKIVWX (X = I, S, R) fibrils**

**Supplementary Table 2. Cryo-EM statistics of AD-tau and AD-tau-D-TLKIVWX (X = I, S, R) complex**

**Supplementary Video 1. Strain-relief of D-TLKIVWX fibrils drives disassembly of AD-tau fibrils.** The structure-based Strain-Relief hypothesis posits that the interaction of right-handed-twisting fibrils formed by peptide D-TLKIVWI with left-handed-twisting fibrils of protein AD-tau produces strain in both fibrils and strain is relieved by disassembly of the fibrils.
